# Supplementary material for: Prevalence of and factors associated with atypical presentation in bacteremic urinary tract infection
Source: PubMed Central journal article supplement (PMC8956699; doi:10.1038/s41598-022-09222-9), 2022-03-25
Supplement: 41598_2022_9222_MOESM1_ESM.pdf [file 41598_2022_9222_MOESM1_ESM.pdf]

**Table S1.** Baseline characteristics of 285 patients with bacteremic urinary tract infection.

| Characteristics <sup>a</sup>                          | Total<br>(n = 285) | Atypical presentation <sup>b</sup> |                  |
|-------------------------------------------------------|--------------------|------------------------------------|------------------|
|                                                       |                    | Yes (n = 144)                      | No (n = 141)     |
| Age                                                   |                    |                                    |                  |
| Median (IQR)                                          | 82 (73–87)         | 83 (78–82)                         | 80 (67–86)       |
| 75 years or older                                     | 205 (71.9)         | 117 (81.3)                         | 88 (62.4)        |
| Ambulance use                                         | 202 (70.9)         | 110 (76.4)                         | 92 (65.3)        |
| Use of antibiotics before presentation                | 19 (6.7)           | 10 (6.9)                           | 9 (6.4)          |
| Vital signs at presentation, median (IQR)             |                    |                                    |                  |
| Body temperature                                      | 38.4 (37.6–39.2)   | 38.5 (37.6–39.1)                   | 38.4 (37.4–39.4) |
| Systolic blood pressure                               | 129 (107–149)      | 127 (104–149)                      | 130 (115–149)    |
| Diastolic blood pressure                              | 68 (58–80)         | 66 (56–80)                         | 70 (59–80)       |
| Heart rate                                            | 102 (88–116)       | 102 (89–116)                       | 102 (87–115)     |
| Respiratory rate                                      | 23 (18–28)         | 23 (18–28)                         | 23 (19–28)       |
| Laboratory tests                                      |                    |                                    |                  |
| Serum glucose <sup>b</sup>                            | 137 (110–191)      | 137 (112–192)                      | 136 (109–191)    |
| Hemoglobin A1c <sup>b</sup>                           | 6.3 (5.6–7.4)      | 6.4 (5.6–7.5)                      | 6.2 (5.6–7.3)    |
| Positive nitrates on dipsticks <sup>b</sup>           | 98 (57.0)          | 42 (51.2)                          | 56 (62.2)        |
| Positive leukocyte esterase on dipsticks <sup>b</sup> | 244 (88.4)         | 124 (87.9)                         | 120 (88.9)       |
| Physicians caring for patients                        |                    |                                    |                  |
| Resident                                              | 90 (31.6)          | 45 (31.2)                          | 45 (31.9)        |
| Attending doctor                                      | 195 (68.4)         | 99 (68.8)                          | 96 (68.1)        |
| Causative bacteria                                    |                    |                                    |                  |
| <i>Escherichia coli</i>                               | 211 (74.0)         | 108 (75.0)                         | 103 (73.1)       |
| <i>Klebsiella</i> species                             | 27 (9.5)           | 13 (9.0)                           | 14 (9.9)         |
| <i>Enterococcus faecalis</i>                          | 9 (3.2)            | 4 (2.8)                            | 5 (3.6)          |
| <i>Citrobacter</i> species                            | 9 (3.2)            | 5 (3.5)                            | 4 (2.8)          |
| <i>Proteus</i> species                                | 8 (2.8)            | 5 (3.5)                            | 3 (2.1)          |
| <i>Pseudomonas. aeruginosa</i>                        | 7 (2.5)            | 2 (1.4)                            | 5 (3.6)          |
| Final diagnosis                                       |                    |                                    |                  |
| Complicated UTI                                       | 82 (28.8)          | 41 (28.5)                          | 41 (29.1)        |
| Pyelonephritis                                        | 169 (59.3)         | 59 (41.0)                          | 110 (78.0)       |
| Causative factors                                     |                    |                                    |                  |
| Urinary catheter-related                              | 23 (8.1)           | 13 (9.0)                           | 10 (7.1)         |
| Neurological bladder                                  | 18 (6.3)           | 12 (8.3)                           | 6 (4.3)          |

|                                              |            |            |           |
|----------------------------------------------|------------|------------|-----------|
| Obstruction due to prostate hypertrophy      | 10 (3.5)   | 7 (4.9)    | 3 (2.1)   |
| Urinary stone-related                        | 40 (14.0)  | 14 (9.7)   | 26 (18.4) |
| Uremia-associated                            | 0 (0.0)    | 0 (0.0)    | 0 (0.0)   |
| Duration of hospital stay, median days (IQR) | 14 (10–21) | 15 (10–26) | 13 (9–18) |

---

<sup>a</sup>Values are expressed as numbers with the percentages of the total numbers, unless otherwise stated.

<sup>b</sup>Data were documented or evaluated in 258, 167, 172, and 276 patients for serum glucose, hemoglobin A1c, nitrates on dipsticks, and leukocyte esterase on dipsticks, respectively.

IQR, interquartile range; UTI, urinary tract infection.
